# Supplementary material for: The Salmonella SPI2 Effector SseI Mediates Long-Term Systemic Infection by Modulating Host Cell Migration
Source: PubMed Central journal article supplement (PMC2777311; doi:10.1371/journal.ppat.1000671), 2009-11-26

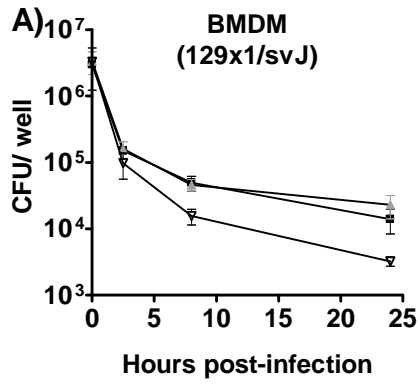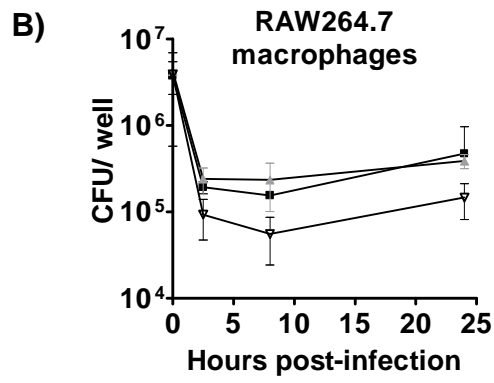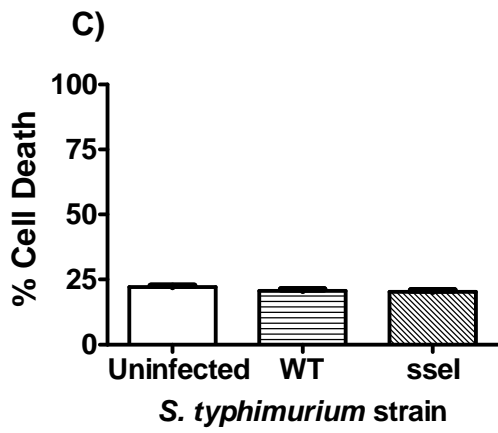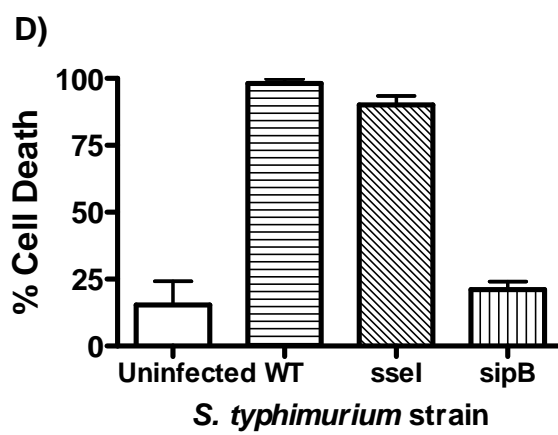

Supplement: ppat.1000671.s001.pdf [file ppat.1000671.s001.pdf]
